# Supplementary material
Source: MDPI journal article supplement (https://www.mdpi.com/2072-4292/14/8/1911)
Supplement: s1 [file s1]

Archive with 2 entries (2 files):
- Figure - Supplementary Materials.pdf
- Table - Supplementary Materials.pdf
