# Supplementary material
Source: MDPI journal article supplement (https://www.mdpi.com/2072-4292/14/8/1911)
Supplement: s1 [file s1]

## Supplementary Materials

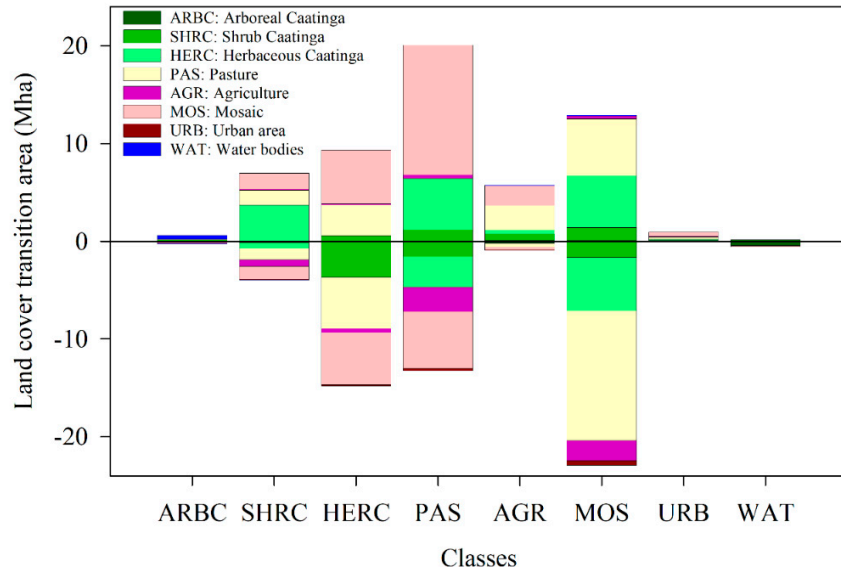

**Figure S1.** Land use/land cover changes in Petrolina between 2013 and 2019. Positive values indicate an expansion of the respective land cover, negative values a contraction. The vertical axe is in million hectares (Mha). Please see Supplementary Table S1 to access values of land use/land cover changes.
