# Supplementary material
Source: MDPI journal article supplement (https://www.mdpi.com/2072-4292/14/8/1911)
Supplement: s1 [file s1 › Table - Supplementary Materials.pdf]

## Supplementary Materials

**Table S1.** Areas of expansion and contraction of land use/land cover changes in Petrolina between 2013 and 2019. Positive values indicate an expansion of the respective land cover, negative values a contraction. The values are in million hectares (Mha).

| Classes                | Changes     | Arboreal<br>Caatinga | Shrub<br>Caatinga | Herbaceous<br>Caatinga | Pasture  | Agriculture | Mosaic    | Urban<br>area | Water<br>bodies |
|------------------------|-------------|----------------------|-------------------|------------------------|----------|-------------|-----------|---------------|-----------------|
| Arboreal<br>Caatinga   | Expansion   | 0                    | 0.04819           | 0.01059                | 0.00344  | 0.07325     | 0.11101   | 0.00009       | 0.04943         |
|                        | Contraction | 0                    | -0.12969          | -0.00538               | -0.03725 | -0.00759    | -0.04025  | -0.00026      | -0.41311        |
| Shrub<br>Caatinga      | Expansion   | 0.12969              | 0                 | 0.57757                | 1.16917  | 0.69077     | 1.29887   | 0.07747       | 0.06038         |
|                        | Contraction | -0.04819             | 0                 | -3.67917               | -1.51427 | -0.10318    | -1.61711  | -0.00044      | -0.03742        |
| Herbaceous<br>Caatinga | Expansion   | 0.00538              | 3.67917           | 0                      | 5.25066  | 0.39497     | 5.32671   | 0.13219       | 0.02004         |
|                        | Contraction | -0.01059             | -0.57757          | 0                      | -3.16846 | -0.09504    | -5.47194  | -0.00106      | -0.00953        |
| Pasture                | Expansion   | 0.03725              | 1.51427           | 3.16846                | 0        | 2.49279     | 5.78982   | 0.22995       | 0.00291         |
|                        | Contraction | -0.00344             | -1.16917          | -5.25066               | 0        | -0.37607    | -13.26448 | -0.00115      | -0.00053        |
| Agriculture            | Expansion   | 0.00759              | 0.10318           | 0.09504                | 0.37607  | 0           | 0.28842   | 0.06707       | 0.00177         |
|                        | Contraction | -0.07325             | -0.69077          | -0.39497               | -2.49279 | 0           | -2.03984  | -0.0015       | -0.04457        |
| Mosaic                 | Expansion   | 0.04025              | 1.61711           | 5.47194                | 13.26448 | 2.03984     | 0         | 0.47289       | 0.03381         |
|                        | Contraction | -0.11101             | -1.29887          | -5.32671               | -5.78982 | -0.28842    | 0         | -0.00432      | -0.07262        |
| Urban area             | Expansion   | 0.00026              | 0.00044           | 0.00106                | 0.00115  | 0.0015      | 0.00432   | 0             | 0.00026         |
|                        | Contraction | -0.00009             | -0.07747          | -0.13219               | -0.22995 | -0.06707    | -0.47289  | 0             | -0.00026        |
| Water<br>bodies        | Expansion   | 0.41311              | 0.03742           | 0.00953                | 0.00053  | 0.04457     | 0.07262   | 0.00026       | 0               |
|                        | Contraction | -0.04943             | -0.06038          | -0.02004               | -0.00291 | -0.00177    | -0.03381  | -0.00026      | 0               |
